# Supplementary material for: The Use of Penalized Regression Analysis to Identify County-Level Demographic and Socioeconomic Variables Predictive of Increased COVID-19 Cumulative Case Rates in the State of Georgia
Source: PubMed Central journal article supplement (PMC7663274; doi:10.3390/ijerph17218036), 2020-10-31
Supplement: ijerph-17-08036-s001.pdf [file ijerph-17-08036-s001.pdf]

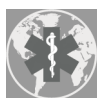

**Table S1.** Variables included and excluded from our database and their level of inclusion in the County Health Reports (CHR) calculations.

| Category             | Included CHR Measures                  | Included Additional Measures     | Excluded CHR Measures     | Excluded Additional Measures            |
|----------------------|----------------------------------------|----------------------------------|---------------------------|-----------------------------------------|
| Health Outcomes      |                                        | Premature Death                  | Life Expectancy           |                                         |
|                      |                                        | Premature Age Adjusted Mortality |                           |                                         |
|                      |                                        | Child Mortality                  |                           |                                         |
|                      |                                        | Infant Mortality                 |                           |                                         |
| Quality of Life      | Poor or Fair Health Days               | Frequent Physical Distress       |                           |                                         |
|                      | Poor Physical Health Days              | Frequent Mental Distress         |                           |                                         |
|                      | Poor Mental Health Days                | Diabetes Prevalence              |                           |                                         |
|                      | Low Birthweight                        | HIV Prevalence                   |                           |                                         |
| Tobacco Use          | Adult Smoking                          |                                  |                           |                                         |
| Diet and Exercise    | Adult Obesity                          | Food Insecurity                  |                           |                                         |
|                      | Food Environment index                 | Limited Access to Health Food    |                           |                                         |
|                      | Physical Inactivity                    |                                  |                           |                                         |
|                      | Access to Exercise                     |                                  |                           |                                         |
| Alcohol and Drug use | Excessive Drinking                     |                                  |                           |                                         |
|                      | Alcohol Impaired Drinking              |                                  |                           | Drug Overdose Deaths                    |
| Sexual Activity      | STDs/Chlamydia Rate                    |                                  |                           |                                         |
|                      | Teen Birth Rate                        |                                  |                           |                                         |
| Other Behavior       |                                        | MV Crash Deaths                  |                           |                                         |
|                      |                                        | Insufficient Sleep               |                           |                                         |
| Access               | Uninsured                              | Uninsured Adults                 |                           |                                         |
|                      |                                        | Uninsured Children               | Primary Care Physicians   |                                         |
|                      | Preventable Hospital Stays             |                                  | Dentists                  |                                         |
|                      |                                        |                                  | Mental Health Providers   | Other Primary Care Providers            |
| Quality of Care      | Annual Mammography                     |                                  |                           |                                         |
|                      | Flu Vaccine                            |                                  |                           |                                         |
| Education            | High School Graduation                 |                                  |                           |                                         |
|                      | Some College                           |                                  |                           | Reading Scores                          |
| Employment           | Unemployment                           |                                  |                           | Math Scores                             |
| Income               | Children in Poverty                    | 20th Income Percentile           |                           | Disconnected Youth                      |
|                      | Income Ratio                           | 80th Income Percentile           |                           | Residential Segregation Black:White     |
|                      | Children Living in Single Parent Homes | Median Household Income          |                           | Residential Segregation Non-White:White |
|                      | Social Associations Rate               | Children Eligible for Free Lunch |                           |                                         |
|                      | Violent Crime                          | Homicides                        |                           |                                         |
|                      | Injury Deaths                          | Firearms Fatalities              |                           | Suicides                                |
| Physical Environment | Air Particulate Matter                 | Traffic Volume                   | Drinking Water Violations | Juvenile Arrests                        |
|                      | Severe Housing Problems                | Homeownership                    |                           |                                         |
|                      | Driving to work                        | Severe Cost of Housing Burden    |                           |                                         |

| Long commute - driving alone |                             |                                          |
|------------------------------|-----------------------------|------------------------------------------|
| Demographic                  | % 18 or Below               |                                          |
|                              | % 65 or Older               |                                          |
|                              | % Non-Hispanic White        | % Non-Hispanic Black                     |
|                              | % Not Proficient in English | % American Indian & Alaskan Native       |
|                              | % Females                   | % Asian                                  |
|                              | % Rural                     | % Native Hawaiian/Other Pacific Islander |

**Table S2.** Descriptive statistics for all variables included in the research.

| Variables                                 | Mean    | Median  | Standard Deviation | Variable                          | Mean     | Median   | Standard Deviation |
|-------------------------------------------|---------|---------|--------------------|-----------------------------------|----------|----------|--------------------|
| Cases per 100,000                         | 1748.34 | 1538.46 | 889.45             | Income ratio                      | 4.97     | 4.89     | 0.94               |
| Ln(cases/100,000)                         | 7.36    | 7.34    | 0.46               | 20th percentile income            | 18946.21 | 16756.00 | 6596.98            |
| % less than 18 years of age               | 22.40   | 22.78   | 3.14               | 80th percentile income            | 90086.91 | 84685.00 | 20825.62           |
| % 65 and over                             | 17.52   | 17.13   | 4.55               | % children in single parent homes | 40.77    | 40.53    | 12.40              |
| % Non-Hispanic White                      | 61.96   | 61.78   | 17.26              | social associations rate          | 8.98     | 9.05     | 3.47               |
| % Not Proficient in English               | 1.62    | 0.93    | 1.95               | Violent Crimes rate               | 307.70   | 273.88   | 219.74             |
| % Female                                  | 50.39   | 51.11   | 3.20               | Injury death rate                 | 77.49    | 77.48    | 18.41              |
| % Rural                                   | 60.49   | 64.71   | 28.97              | Average daily PM2.5               | 10.74    | 10.90    | 0.62               |
| % poor of fair health days                | 20.10   | 20.16   | 3.73               | % severe housing problems         | 15.97    | 15.70    | 3.26               |
| number of poor physical health days       | 3.85    | 3.88    | 0.44               | % drive to work alone to work     | 82.41    | 82.59    | 5.40               |
| number poor mental health days            | 4.07    | 4.10    | 0.30               | % long commute drive alone        | 36.92    | 36.80    | 11.96              |
| % low birthweight                         | 10.01   | 9.82    | 2.04               | Life expectancy                   | 76.16    | 75.95    | 2.30               |
| % smokers                                 | 18.26   | 18.25   | 2.30               | Age adjusted death rate           | 466.91   | 472.82   | 93.50              |
| % obesity                                 | 34.45   | 34.70   | 5.89               | % frequent physical distress      | 12.13    | 12.19    | 1.61               |
| Food environment index                    | 7.08    | 7.20    | 1.22               | % frequent mental distress        | 13.21    | 13.28    | 1.28               |
| % physical activity                       | 30.85   | 30.60   | 5.45               | % adults with diabetes            | 14.67    | 14.00    | 4.84               |
| % with access to exercise                 | 54.17   | 59.30   | 26.79              | HIV Prevalence Rate               | 311.88   | 264.50   | 224.51             |
| % excessive drinking                      | 14.90   | 14.73   | 1.92               | % food insecurity                 | 15.71    | 16.20    | 4.36               |
| % Driving Deaths with Alcohol Involvement | 22.69   | 22.22   | 11.61              | % limited access to healthy foods | 7.64     | 5.78     | 7.73               |
| Chlamydia Rate                            | 512.03  | 489.40  | 247.98             | Motor Vehicle mortality rate      | 18.51    | 18.47    | 8.63               |
| Teen Birth Rate                           | 35.79   | 37.23   | 13.40              | % insufficient sleep              | 37.04    | 37.12    | 2.69               |
| % uninsured                               | 16.54   | 16.30   | 2.62               | % uninsured adults                | 20.10    | 19.74    | 3.27               |
| % with annual mammography                 | 40.01   | 40.00   | 5.16               | % uninsured children              | 7.68     | 7.31     | 1.56               |
| % with flu vaccine                        | 41.13   | 42.00   | 5.62               | Median household income           | 47507.08 | 43439.00 | 13626.51           |
| % High School graduation                  | 87.69   | 88.14   | 5.52               | % free lunch                      | 73.32    | 74.61    | 20.47              |
| % some college                            | 50.72   | 49.66   | 11.96              | Segregation index B/W             | 29.53    | 29.91    | 15.09              |
| % unemployment                            | 4.44    | 4.25    | 0.92               | Segregation index NW/W            | 26.30    | 26.04    | 12.84              |
| % children in poverty                     | 28.63   | 30.10   | 9.34               | Firearms fatality rate            | 14.76    | 15.73    | 6.71               |
| % severe housing cost burden              | 13.58   | 13.25   | 3.32               | Traffic volume                    | 96.23    | 49.79    | 173.63             |
| Infant Mortality Rate                     | 7.35    | 7.63    | 3.34               | % homeownership                   | 67.97    | 68.36    | 8.95               |
| Child Mortality Rate                      | 73.10   | 71.96   | 24.26              |                                   |          |          |                    |

**Table S3.** t statistics and associated p-values for all variables included in analysis.

| <b>Variable</b>                        | <b>Student's t test<br/>for <math>\mu_0 = 0</math></b> | <b>p-value for t test</b> |
|----------------------------------------|--------------------------------------------------------|---------------------------|
| Percent non-Hispanic white             | 45.2597                                                | <0.0001                   |
| Segregation Index - Black:White        | 24.6791                                                | <0.0001                   |
| Percent under 18 years of age          | 89.9538                                                | <0.0001                   |
| Percent female                         | 198.6648                                               | <0.0001                   |
| Percent not proficient in English      | 10.4926                                                | <0.0001                   |
| Percent who report poor or fair health | 67.9243                                                | <0.0001                   |
| Women with annual mammography          | 97.7386                                                | <0.0001                   |
| Percent with annual flu vaccine        | 92.2813                                                | <0.0001                   |
| Violent crimes rate                    | 17.6568                                                | <0.0001                   |
| Long commute who drive alone           | 38.9434                                                | <0.0001                   |
| Average daily PM <sub>2.5</sub>        | 217.9835                                               | <0.0001                   |
| Children in single-family homes        | 41.4615                                                | <0.0001                   |
| Teen birth rate                        | 61.9721                                                | <0.0001                   |
| Children in poverty                    | 38.6565                                                | <0.0001                   |
| Low birthweight                        | 61.9721                                                | <0.0001                   |
| Children qualifying for free lunch     | 45.1642                                                | <0.0001                   |
| Child mortality rate                   | 37.9985                                                | <0.0001                   |
| Uninsured adults                       | 77.4152                                                | <0.0001                   |
